# Supplementary material
Source: PubMed Central journal article supplement (PMC3074605)
Supplement: NIHMS259677-supplement-Supp1.pdf [file NIHMS259677-supplement-Supp1.pdf]

**Supplement material**

**Table I. Postmenopausal Hormone Therapy Effect on Change in Biomarker Levels according to Number of Minor Alleles of Estrogen Receptor SNPs<sup>1</sup>**

| Biomarker                       | E+P vs. E+P Placebo (95% CI) |                    |                    | E-alone vs. E-alone Placebo (95% CI) |                    |                    | Marginal<br>p <sup>2</sup> | Corrected<br>p <sup>3</sup> |
|---------------------------------|------------------------------|--------------------|--------------------|--------------------------------------|--------------------|--------------------|----------------------------|-----------------------------|
|                                 | Number of minor alleles      |                    |                    | Number of minor alleles              |                    |                    |                            |                             |
|                                 | 0                            | 1                  | 2                  | 0                                    | 1                  | 2                  |                            |                             |
| <b>LDL-C, mmol/L</b>            |                              |                    |                    |                                      |                    |                    |                            |                             |
| ESR1 IVS-401                    | -0.51(-0.73,-0.29)           | -0.52(-0.71,-0.33) | -0.52(-0.75,-0.29) | -0.73(-0.98,-0.48)                   | -0.63(-0.83,-0.43) | -0.53(-0.78,-0.28) | .273                       | 1.000                       |
| ESR1 Exon 1+30                  | -0.39(-0.61,-0.18)           | -0.46(-0.64,-0.27) | -0.52(-0.74,-0.29) | -0.72(-0.97,-0.47)                   | -0.56(-0.76,-0.36) | -0.41(-0.66,-0.15) | .115                       | 0.973                       |
| ESR1 IVS1-354                   | -0.41(-0.60,-0.22)           | -0.43(-0.60,-0.25) | -0.43(-0.68,-0.19) | -0.62(-0.84,-0.41)                   | -0.50(-0.69,-0.31) | -0.37(-0.64,-0.11) | .068                       | 0.909                       |
| ESR1 IVS1-1415                  | -0.41(-0.59,-0.23)           | -0.43(-0.60,-0.26) | -0.45(-0.71,-0.20) | -0.58(-0.78,-0.37)                   | -0.50(-0.69,-0.32) | -0.43(-0.71,-0.15) | .016                       | 0.389                       |
| ESR1 IVS1-1505                  | -0.52(-0.73,-0.30)           | -0.51(-0.70,-0.33) | -0.50(-0.74,-0.27) | -0.73(-0.98,-0.49)                   | -0.62(-0.82,-0.42) | -0.50(-0.76,-0.25) | .226                       | 1.000                       |
| ESR1 IVS1-1989                  | -0.48(-0.63,-0.32)           | -0.49(-0.68,-0.27) | -0.49(-0.84,-0.14) | -0.66(-0.83,-0.48)                   | -0.48(-0.71,-0.26) | -0.31(-0.71,0.09)  | .285                       | 1.000                       |
| ESR2 1730G                      | -0.62(-0.82,-0.42)           | -0.56(-0.73,-0.38) | -0.49(-0.74,-0.25) | -0.67(-0.89,-0.45)                   | -0.69(-0.88,-0.50) | -0.71(-0.98,-0.44) | .227                       | 0.999                       |
| <b>HDL-C, mmol/L</b>            |                              |                    |                    |                                      |                    |                    |                            |                             |
| ESR1 IVS-401                    | 0.13(0.07,0.20)              | 0.13(0.08,0.19)    | 0.14(0.06,0.21)    | 0.23(0.15,0.31)                      | 0.22(0.16,0.29)    | 0.22(0.14,0.29)    | .462                       | 1.000                       |
| ESR1 Exon 1+30                  | 0.12(0.06,0.19)              | 0.11(0.06,0.17)    | 0.10(0.03,0.17)    | 0.20(0.13,0.28)                      | 0.20(0.14,0.26)    | 0.20(0.12,0.28)    | .646                       | 1.000                       |
| ESR1 IVS1-354                   | 0.12(0.06,0.18)              | 0.12(0.07,0.18)    | 0.13(0.05,0.20)    | 0.23(0.16,0.30)                      | 0.21(0.15,0.26)    | 0.18(0.10,0.26)    | .371                       | 1.000                       |
| ESR1 IVS1-1415                  | 0.12(0.06,0.17)              | 0.11(0.06,0.17)    | 0.11(0.03,0.19)    | 0.21(0.15,0.27)                      | 0.20(0.14,0.56)    | 0.19(0.10,0.28)    | .651                       | 1.000                       |
| ESR1 IVS1-1505                  | 0.13(0.06,0.20)              | 0.13(0.07,0.19)    | 0.13(0.06,0.20)    | 0.24(0.16,0.31)                      | 0.22(0.16,0.28)    | 0.20(0.12,0.28)    | .415                       | 1.000                       |
| ESR1 IVS1-1989                  | 0.10(0.05,0.15)              | 0.10(0.04,0.16)    | 0.10(-0.01,0.21)   | 0.19(0.13,0.24)                      | 0.19(0.12,0.26)    | 0.19(0.07,0.32)    | .990                       | 1.000                       |
| ESR2 1730G                      | 0.11(0.05,0.17)              | 0.10(0.05,0.16)    | 0.09(0.01,0.16)    | 0.20(0.13,0.27)                      | 0.19(0.13,0.26)    | 0.18(0.10,0.27)    | .919                       | 1.000                       |
| <b>Triglycerides, mmol/L</b>    |                              |                    |                    |                                      |                    |                    |                            |                             |
| ESR1 IVS-401                    | 0.00(-0.22,0.22)             | 0.00(-0.16,0.23)   | 0.07(-0.16,0.31)   | 0.27(0.01,0.52)                      | 0.22(0.02,0.43)    | 0.19(-0.06,0.44)   | .086                       | 0.950                       |
| ESR1 Exon 1+30                  | 0.00(-0.21,0.23)             | 0.06(-0.12,0.25)   | 0.11(-0.11,0.34)   | 0.32(0.07,0.57)                      | 0.25(0.05,0.46)    | 0.19(-0.06,0.44)   | .131                       | 0.999                       |
| ESR1 IVS1-354                   | 0.10(-0.08,0.30)             | 0.10(-0.08,0.27)   | 0.08(-0.16,0.33)   | 0.31(0.10,0.53)                      | 0.29(0.10,0.48)    | 0.27(0.00,0.54)    | .146                       | 0.998                       |
| ESR1 IVS1-1415                  | 0.11(-0.07,0.29)             | 0.10(-0.07,0.27)   | 0.09(-0.16,0.34)   | 0.32(0.12,0.53)                      | 0.29(0.10,0.48)    | 0.26(-0.02,0.54)   | .123                       | 0.998                       |
| ESR1 IVS1-1505                  | 0.02(-0.19,0.24)             | 0.04(-0.15,0.23)   | 0.06(-0.18,0.29)   | 0.27(0.02,0.52)                      | 0.24(0.03,0.44)    | 0.21(-0.05,0.46)   | .105                       | 0.994                       |
| ESR1 IVS1-1989                  | 0.15(-0.00,0.00)             | 0.25(0.05,0.46)    | 0.36(-0.00,0.72)   | 0.39(0.21,0.57)                      | 0.38(0.15,0.61)    | 0.37(-0.04,0.78)   | .504                       | 1.000                       |
| ESR2 1730G                      | 0.18(-0.02,0.38)             | 0.23(0.05,0.40)    | 0.27(0.02,0.52)    | 0.46(0.23,0.68)                      | 0.40(0.21,0.59)    | 0.35(0.07,0.62)    | .828                       | 1.000                       |
| <b>C-reactive protein, mg/L</b> |                              |                    |                    |                                      |                    |                    |                            |                             |
| ESR1 IVS-401                    | -0.28(-2.90,2.35)            | -0.06(-2.34,2.21)  | 0.15(-2.64,2.95)   | 0.03(-2.97,3.04)                     | 1.76(-0.67,4.20)   | 3.50(0.47,6.52)    | .244                       | 1.000                       |
| ESR1 Exon 1+30                  | -0.16(-2.76,2.45)            | 0.39(-1.82,2.59)   | 0.93(-1.76,3.62)   | 0.65(-2.32,3.62)                     | 2.32(-0.05,4.70)   | 4.00(1.00,6.99)    | .459                       | 1.000                       |
| ESR1 IVS1-354                   | 0.31(-1.97,2.59)             | 0.46(-1.63,2.56)   | 0.61(-2.34,3.56)   | 0.74(-1.80,3.29)                     | 2.78(0.54,5.03)    | 4.82(1.67,7.97)    | .232                       | 1.000                       |

| Biomarker                                | E+P vs. E+P Placebo (95% CI) |                    |                    | E-alone vs. E-alone Placebo (95% CI) |                    |                    | Marginal p <sup>2</sup> | Corrected p <sup>3</sup> |
|------------------------------------------|------------------------------|--------------------|--------------------|--------------------------------------|--------------------|--------------------|-------------------------|--------------------------|
|                                          | Number of minor alleles      |                    |                    | Number of minor alleles              |                    |                    |                         |                          |
|                                          | 0                            | 1                  | 2                  | 0                                    | 1                  | 2                  |                         |                          |
| ESR1 IVS1-1415                           | 0.46(-1.71,2.63)             | 0.51(-1.58,2.60)   | 0.56(-2.51,3.63)   | 1.86(-0.59,4.32)                     | 2.55(0.33,4.78)    | 3.24(-0.06,6.55)   | .889                    | 1.000                    |
| ESR1 IVS1-1505                           | -0.17(-2.76,2.42)            | 0.09(-2.16,2.35)   | 0.35(-2.44,3.15)   | 0.44(-2.51,3.40)                     | 1.99(-0.42,4.40)   | 3.54(0.49,6.59)    | 0.374                   | 1.000                    |
| ESR1 IVS1-1989                           | 0.53(-1.38,2.43)             | 1.02(-1.38,3.43)   | 1.52(-2.67,5.72)   | 1.99(-0.17,4.14)                     | 4.10(1.39,6.81)    | 6.21(1.38,11.05)   | 0.705                   | 1.000                    |
| ESR2 1730G                               | 0.23(-2.17,2.64)             | 1.83(-0.34,4.01)   | 3.43(0.43,6.43)    | 3.75(1.10,6.40)                      | 2.96(0.64,5.28)    | 2.17(-1.12,5.47)   | 0.280                   | 1.000                    |
| <b>E-selectin, mcg/L</b>                 |                              |                    |                    |                                      |                    |                    |                         |                          |
| ESR1 IVS-401                             | -11.4(-14.9,-7.91)           | -11.0(-14.1,-7.97) | -10.7(-14.4,-6.87) | -9.35(-13.5,-5.21)                   | -10.1(-13.4,-6.79) | -10.9(-15.0,-6.71) | 0.233                   | 1.000                    |
| ESR1 Exon 1+30                           | -11.3(-14.8,-7.77)           | -11.2(-14.1,-8.16) | -11.0(-14.7,-7.36) | -9.11(-13.2,-5.05)                   | -10.0(-13.2,-6.78) | -10.9(-15.0,-6.78) | 0.234                   | 1.000                    |
| ESR1 IVS1-354                            | -10.6(-13.7,-7.49)           | -9.49(-12.3,-6.65) | -8.41(-12.4,-4.39) | -8.89(-12.4,-5.37)                   | -8.80(-11.9,-5.74) | -8.72(-13.0,-4.39) | 0.151                   | 0.999                    |
| ESR1 IVS1-1415                           | -9.94(-12.9,-7.00)           | -9.13(-12.0,-6.31) | -8.32(-12.5,-4.14) | -7.86(-11.2,-4.50)                   | -8.71(-11.7,-5.67) | -9.55(-14.1,-5.03) | 0.198                   | 1.000                    |
| ESR1 IVS1-1505                           | -11.1(-14.6,-7.69)           | -10.7(-13.7,-7.64) | -10.2(-14.0,-6.39) | -8.33(-12.4,-4.30)                   | -9.72(-13.0,-6.46) | -11.1(-15.3,-6.95) | 0.255                   | 1.000                    |
| ESR1 IVS1-1989                           | -9.36(-11.9,-6.79)           | -11.6(-15.1,-8.14) | -13.9(-20.1,-7.66) | -8.23(-11.2,-5.29)                   | -10.0(-13.7,-6.31) | -11.8(-18.4,-5.20) | 0.832                   | 1.000                    |
| ESR2 1730G                               | -9.82(-13.1,-6.53)           | -8.24(-11.2,-5.29) | -6.66(-10.8,-2.54) | -7.43(-11.1,-3.76)                   | -7.77(-11.0,-4.57) | -8.11(-12.7,-3.53) | 0.738                   | 1.000                    |
| <b>Matrix metalloproteinase-9, mcg/L</b> |                              |                    |                    |                                      |                    |                    |                         |                          |
| ESR1 IVS-401                             | 75.35(20.45,130.3)           | 60.84(13.26,108.4) | 46.34(-12.8,105.5) | 33.62(-30.6,97.79)                   | 37.94(-13.4,89.24) | 42.26(-22.4,107.0) | 0.505                   | 1.000                    |
| ESR1 Exon 1+30                           | 41.06(-13.1,95.18)           | 37.53(-8.23,83.30) | 34.01(-22.4,90.45) | 17.15(-44.9,79.20)                   | 19.77(-29.6,69.13) | 22.39(-41.2,85.97) | 0.856                   | 1.000                    |
| ESR1 IVS1-354                            | 70.91(22.78,119.0)           | 56.27(12.14,100.4) | 41.63(-21.2,104.5) | 31.66(-23.0,86.31)                   | 39.00(-8.50,86.50) | 46.35(-21.3,114.0) | 0.594                   | 1.000                    |
| ESR1 IVS1-1415                           | 72.09(26.26,117.9)           | 50.12(6.34,93.91)  | 28.15(-37.1,93.39) | 31.67(-20.4,83.73)                   | 37.67(-9.42,84.77) | 43.67(-27.0,114.3) | 0.436                   | 1.000                    |
| ESR1 IVS1-1505                           | 75.49(21.24,129.7)           | 58.13(11.07,105.2) | 40.78(-18.4,99.97) | 36.28(-26.3,98.90)                   | 36.46(-14.2,87.11) | 36.64(-28.6,101.8) | 0.625                   | 1.000                    |
| ESR1 IVS1-1989                           | 51.85(12.40,91.31)           | 47.57(-4.97,100.1) | 43.28(-50.5,137.1) | 42.51(-2.07,87.10)                   | 24.59(-30.9,80.05) | 6.67(-91.5,104.8)  | 0.891                   | 1.000                    |
| ESR2 1730G                               | 112.6(61.72,163.5)           | 83.03(37.87,128.2) | 53.43(-9.64,116.5) | 63.41(7.34,119.5)                    | 68.33(19.29,117.4) | 73.25(2.62,143.9)  | 0.035                   | 0.697                    |
| <b>Fibrinogen, g/L</b>                   |                              |                    |                    |                                      |                    |                    |                         |                          |
| ESR1 IVS-401                             | -0.26(-0.498,-0.41)          | -0.35(-0.54,-0.15) | -0.43(-0.67,-0.19) | -0.37(-0.63,-0.11)                   | -0.27(-0.47,-0.56) | -0.16(-0.42,0.10)  | 0.223                   | 1.000                    |
| ESR1 Exon 1+30                           | -0.30(-0.52,-0.74)           | -0.32(-0.51,-0.13) | -0.35(-0.58,-0.11) | -0.41(-0.67,-0.16)                   | -0.24(-0.45,-0.38) | -0.07(-0.33,0.19)  | 0.072                   | 0.757                    |
| ESR1 IVS1-354                            | -0.25(-0.44,-0.52)           | -0.37(-0.54,-0.19) | -0.48(-0.74,-0.23) | -0.31(-0.53,-0.91)                   | -0.23(-0.42,-0.34) | -0.14(-0.42,0.13)  | 0.054                   | 0.782                    |
| ESR1 IVS1-1415                           | -0.29(-0.47,-0.10)           | -0.39(-0.57,-0.22) | -0.50(-0.76,-0.24) | -0.29(-0.50,-0.84)                   | -0.26(-0.45,-0.68) | -0.23(-0.51,0.61)  | 0.199                   | 0.978                    |
| ESR1 IVS1-1505                           | -0.30(-0.52,-0.75)           | -0.36(-0.55,-0.17) | -0.42(-0.66,-0.18) | -0.38(-0.63,-0.13)                   | -0.27(-0.48,-0.65) | -0.16(-0.43,0.10)  | 0.235                   | 1.000                    |
| ESR1 IVS1-1989                           | -0.31(-0.47,-0.15)           | -0.31(-0.52,-0.11) | -0.32(-0.67,0.41)  | -0.28(-0.47,-0.10)                   | -0.88(-0.32,0.14)  | 0.11(-0.31,0.52)   | 0.491                   | 1.000                    |
| ESR2 1730G                               | -0.31(-0.52,-0.11)           | -0.22(-0.41,-0.36) | -0.13(-0.39,0.13)  | -0.18(-0.41,0.54)                    | -0.18(-0.37,0.25)  | -0.17(-0.46,0.11)  | 0.445                   | 1.000                    |
| <b>PAI-1 Ag, mcg/L</b>                   |                              |                    |                    |                                      |                    |                    |                         |                          |
| ESR1 IVS-401                             | -13.9(-27.3,-0.45)           | -13.5(-25.1,-1.91) | -13.1(-27.4,1.12)  | -22.9(-38.4,-7.42)                   | -14.5(-27.0,-2.00) | -6.04(-21.7,9.57)  | 0.203                   | 1.000                    |
| ESR1 Exon 1+30                           | -10.1(-23.6,3.34)            | -11.1(-22.5,0.24)  | -12.2(-26.0,1.62)  | -14.6(-30.1,0.91)                    | -11.6(-23.9,0.75)  | -8.58(-24.4,7.19)  | 0.789                   | 1.000                    |
| ESR1 IVS1-354                            | -16.6(-28.2,-4.90)           | -10.6(-21.3,0.06)  | -4.66(-19.7,10.42) | -18.5(-31.8,-5.23)                   | -12.1(-23.6,-0.56) | -5.66(-22.0,10.70) | 0.178                   | 0.999                    |
| ESR1 IVS1-1415                           | -15.5(-26.6,-4.42)           | -9.75(-20.4,0.89)  | -4.00(-19.7,11.70) | -14.9(-27.7,-2.14)                   | -12.4(-23.8,-0.90) | -9.77(-27.0,7.46)  | 0.231                   | 1.000                    |

| Biomarker                          | E+P vs. E+P Placebo (95% CI) |                    |                    | E-alone vs. E-alone Placebo (95% CI) |                    |                    | Marginal<br>p <sup>2</sup> | Corrected<br>p <sup>3</sup> |
|------------------------------------|------------------------------|--------------------|--------------------|--------------------------------------|--------------------|--------------------|----------------------------|-----------------------------|
|                                    | Number of minor alleles      |                    |                    | Number of minor alleles              |                    |                    |                            |                             |
|                                    | 0                            | 1                  | 2                  | 0                                    | 1                  | 2                  |                            |                             |
| ESR1 IVS1-1505                     | -10.7(-23.9,2.52)            | -10.9(-22.3,0.60)  | -11.0(-25.3,3.24)  | -18.8(-34.1,-3.64)                   | -11.2(-23.6,1.10)  | -3.62(-19.4,12.14) | 0.462                      | 1.000                       |
| ESR1 IVS1-1989                     | -3.58(-13.3,6.13)            | -13.1(-25.3,-0.93) | -22.6(-43.8,-1.54) | -7.65(-18.7,3.42)                    | -4.07(-18.2,10.08) | -0.50(-25.8,24.75) | 0.073                      | 0.975                       |
| ESR2 1730G                         | 1.87(-10.5,14.19)            | -6.10(-17.2,4.97)  | -14.1(-29.7,1.52)  | -3.27(-17.1,10.51)                   | -5.18(-17.1,6.73)  | -7.09(-24.1,9.91)  | 0.034                      | 0.886                       |
| <b>Plasmin-antiplasmin, nmol/L</b> |                              |                    |                    |                                      |                    |                    |                            |                             |
| ESR1 IVS-401                       | 1.71(1.12,2.30)              | 1.06(0.55,1.57)    | 0.41(-0.22,1.04)   | 1.36(0.68,2.04)                      | 1.08(0.53,1.62)    | 0.79(0.11,1.48)    | 0.001                      | 0.296                       |
| ESR1 Exon 1+30                     | 1.31(0.71,1.90)              | 0.93(0.42,1.43)    | 0.55(-0.06,1.16)   | 0.90(0.22,1.59)                      | 0.90(0.36,1.45)    | 0.90(0.21,1.60)    | 0.118                      | 1.000                       |
| ESR1 IVS1-354                      | 1.72(1.21,2.23)              | 0.85(0.39,1.32)    | -0.02(-0.68,0.64)  | 1.24(0.66,1.82)                      | 1.06(0.55,1.56)    | 0.87(0.16,1.58)    | 0.000                      | 0.014                       |
| ESR1 IVS1-1415                     | 1.64(1.15,2.12)              | 0.71(0.25,1.17)    | -0.21(-0.90,0.47)  | 1.16(0.60,1.71)                      | 1.01(0.51,1.50)    | 0.85(0.10,1.60)    | 0.000                      | 0.014                       |
| ESR1 IVS1-1505                     | 1.73(1.15,2.31)              | 1.04(0.53,1.54)    | 0.35(-0.28,0.97)   | 1.33(0.66,1.99)                      | 1.06(0.52,1.60)    | 0.80(0.11,1.49)    | 0.001                      | 0.214                       |
| ESR1 IVS1-1989                     | 0.75(0.34,1.16)              | 1.03(0.51,1.55)    | 1.31(0.41,2.21)    | 0.73(0.26,1.20)                      | 0.83(0.23,1.42)    | 0.92(-0.14,1.99)   | 0.423                      | 1.000                       |
| ESR2 1730G                         | 1.06(0.50,1.61)              | 0.84(0.34,1.33)    | 0.62(-0.08,1.33)   | 0.77(0.15,1.38)                      | 0.90(0.37,1.43)    | 1.03(0.27,1.79)    | 0.630                      | 1.000                       |
| <b>Homocysteine, mg/L</b>          |                              |                    |                    |                                      |                    |                    |                            |                             |
| ESR1 IVS-401                       | -0.46(-1.22,0.31)            | -0.67(-1.34,0.00)  | -0.89(-1.71,-0.07) | -0.60(-1.48,0.29)                    | -0.66(-1.38,0.06)  | -0.72(-1.61,0.18)  | 0.038                      | 0.754                       |
| ESR1 Exon 1+30                     | -0.66(-1.43,0.10)            | -0.88(-1.54,-0.23) | -1.11(-1.90,-0.31) | -1.27(-2.15,-0.38)                   | -0.88(-1.59,-0.18) | -0.50(-1.39,0.40)  | 0.059                      | 0.948                       |
| ESR1 IVS1-354                      | -0.23(-0.90,0.44)            | -0.39(-1.01,0.22)  | -0.56(-1.43,0.32)  | -0.19(-0.95,0.56)                    | -0.42(-1.08,0.25)  | -0.64(-1.58,0.30)  | 0.080                      | 0.995                       |
| ESR1 IVS1-1415                     | -0.18(-0.81,0.46)            | -0.37(-0.98,0.25)  | -0.55(-1.46,0.35)  | -0.18(-0.90,0.55)                    | -0.37(-1.03,0.29)  | -0.56(-1.55,0.42)  | 0.130                      | 0.979                       |
| ESR1 IVS1-1505                     | -0.43(-1.19,0.33)            | -0.64(-1.30,0.02)  | -0.85(-1.67,-0.03) | -0.55(-1.41,0.32)                    | -0.63(-1.34,0.08)  | -0.71(-1.62,0.20)  | 0.043                      | 0.777                       |
| ESR1 IVS1-1989                     | -0.64(-1.20,-0.09)           | -0.58(-1.29,0.13)  | -0.52(-1.75,0.72)  | -0.93(-1.56,-0.30)                   | -0.23(-1.04,0.57)  | 0.46(-0.98,1.89)   | 0.018                      | 0.553                       |
| ESR2 1730G                         | -0.42(-1.13,0.29)            | -0.59(-1.22,0.05)  | -0.75(-1.63,0.13)  | -0.99(-1.78,-0.20)                   | -0.40(-1.08,0.29)  | 0.20(-0.78,1.18)   | 0.091                      | 0.976                       |
| <b>D-dimer, mg/L</b>               |                              |                    |                    |                                      |                    |                    |                            |                             |
| ESR1 IVS-401                       | 0.21(0.00,0.42)              | 0.18(-0.01,0.36)   | 0.14(-0.09,0.37)   | 0.01(-0.24,0.26)                     | 0.05(-0.15,0.25)   | 0.09(-0.16,0.34)   | 0.867                      | 1.000                       |
| ESR1 Exon 1+30                     | 0.20(-0.01,0.42)             | 0.18(-0.01,0.36)   | 0.15(-0.07,0.37)   | 0.05(-0.20,0.29)                     | 0.05(-0.15,0.24)   | 0.05(-0.20,0.30)   | 0.876                      | 1.000                       |
| ESR1 IVS1-354                      | 0.22(0.04,0.41)              | 0.24(0.07,0.41)    | 0.25(0.01,0.49)    | 0.10(-0.11,0.31)                     | 0.10(-0.08,0.29)   | 0.10(-0.16,0.36)   | 0.834                      | 1.000                       |
| ESR1 IVS1-1415                     | 0.28(0.11,0.46)              | 0.22(0.05,0.39)    | 0.16(-0.09,0.41)   | 0.14(-0.06,0.34)                     | 0.10(-0.08,0.29)   | 0.06(-0.21,0.33)   | 0.252                      | 1.000                       |
| ESR1 IVS1-1505                     | 0.24(0.03,0.45)              | 0.21(0.02,0.39)    | 0.17(-0.06,0.40)   | 0.04(-0.20,0.28)                     | 0.09(-0.11,0.28)   | 0.13(-0.12,0.38)   | 0.768                      | 1.000                       |
| ESR1 IVS1-1989                     | 0.13(-0.02,0.29)             | 0.20(0.00,0.40)    | 0.26(-0.09,0.61)   | -0.03(-0.20,0.15)                    | 0.11(-0.11,0.33)   | 0.24(-0.15,0.64)   | 0.446                      | 1.000                       |
| ESR2 1730G                         | 0.24(0.05,0.44)              | 0.14(-0.03,0.32)   | 0.04(-0.21,0.28)   | 0.05(-0.16,0.27)                     | 0.04(-0.15,0.23)   | 0.02(-0.25,0.29)   | 0.760                      | 1.000                       |

<sup>1</sup> Change from baseline to year one in active treatment arm - change from baseline to year one in placebo arm, estimated from regression models that are linear in the number of minor SNP alleles, adjusted for potential confounders as in Table 1 and Table 2, except that baseline hysterectomy status interacted with treatments and SNPs, thus allowing the treatment\*SNP effect to be different in E-alone and E+P trial.

<sup>2</sup> Three degree of freedom test of no interactions between treatment assignment (active vs. placebo), hysterectomy status and polymorphism that is linear in the number of minor alleles, adjusted for covariates as above.

<sup>3</sup>Multiple comparison permutation adjusted p-values, based on 1,000 permutations. The SNP by treatment interaction was permuted at each iteration.
